# Supplementary figures and images for: Visual attention in a complex search task differs between honeybees and bumblebees
Source: Oxford University Press journal article supplement (doi:10.1242/jeb.066399), 2012-06-21

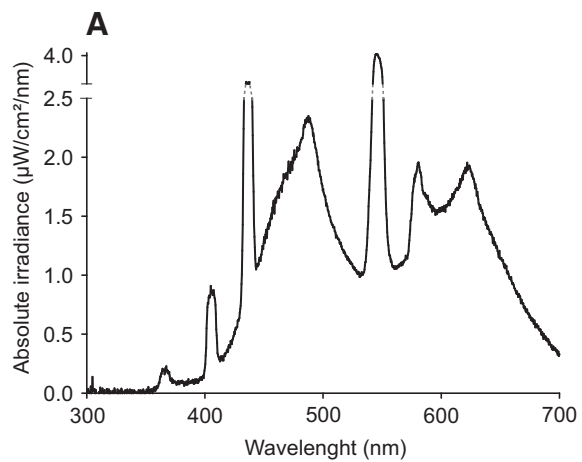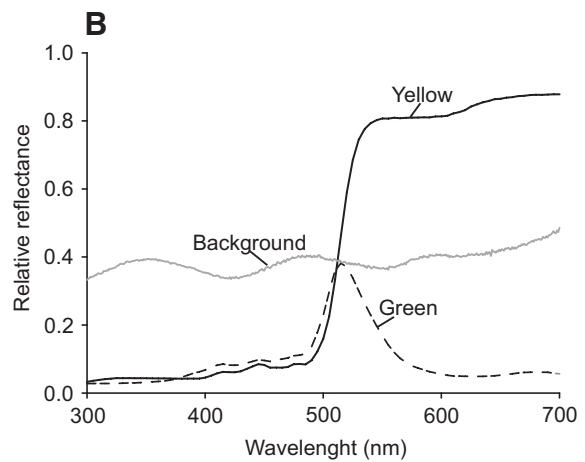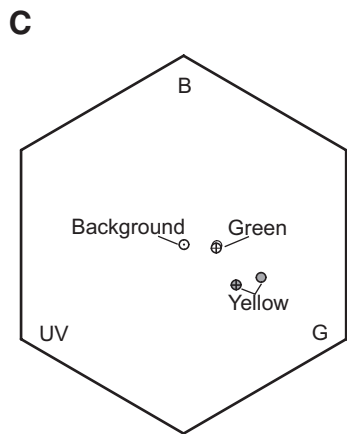

Supplement: jeb066399figs1.pdf [file jeb066399figs1.pdf]

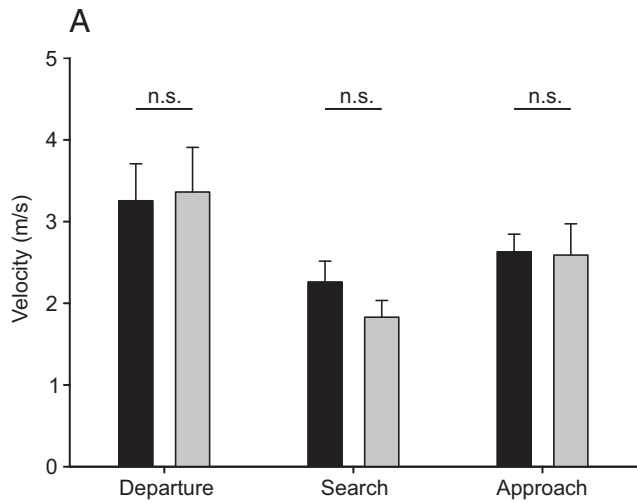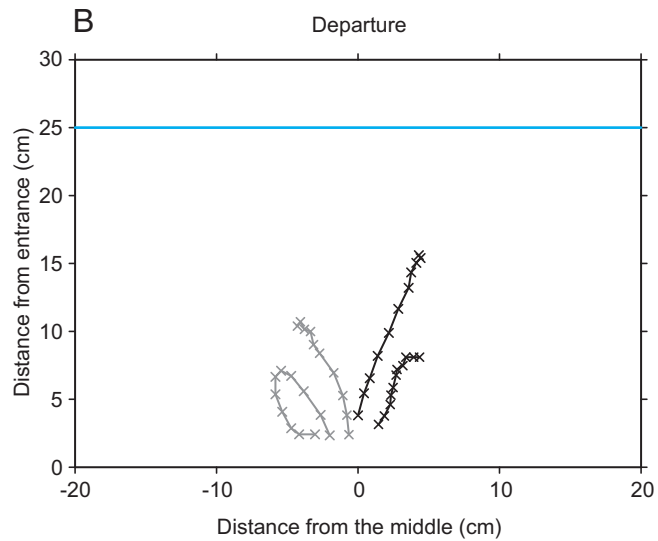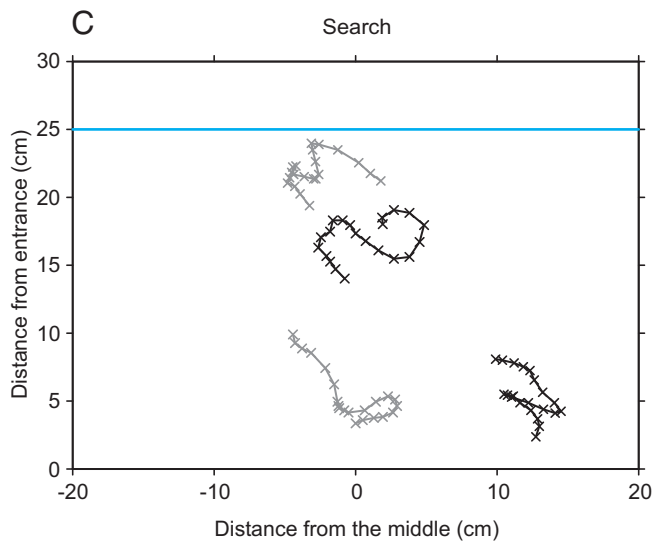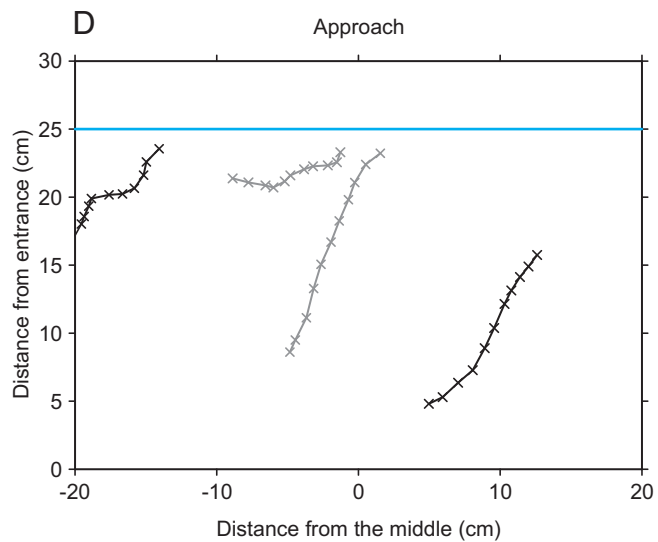

Supplement: jeb066399figs2.pdf [file jeb066399figs2.pdf]
